## Retraction

**Retraction: Selenium-enriched polysaccharides from *Pyracantha fortuneana* (Se-PFPs) inhibit the growth and invasive potential of ovarian cancer cells through inhibiting  $\beta$ -catenin signaling****Qianling Sun<sup>1,\*</sup>, Mengmeng Dong<sup>1,\*</sup>, Zhihui Wang<sup>2,\*</sup>, Changdong Wang<sup>3</sup>, Deqiao Sheng<sup>1</sup>, Zhihong Li<sup>1</sup>, Debin Huang<sup>4</sup> and Chengfu Yuan<sup>1</sup>**<sup>1</sup>College of Medical Science, China Three Gorges University, Yichang, HuBei 443002, China<sup>2</sup>Renhe Hospital of China Three Gorges University, Yichang, HuBei 443002, China<sup>3</sup>Molecular Medicine & Cancer Research Center, Chongqing Medical University, Chong qing 400016, China<sup>4</sup>Department of Pharmacology, Hubei Institute for Nationalities, Enshi, HuBei 445000, China

\*These authors have contributed equally to this work

**Published:** December 31, 2025**Copyright:** © 2025 Sun et al. This is an open access article distributed under the terms of the [Creative Commons Attribution License](#) (CC BY 4.0), which permits unrestricted use, distribution, and reproduction in any medium, provided the original author and source are credited.

**This article has been retracted:** This decision was made following an investigation by Oncotarget into concerns raised by readers and a subsequent request from the corresponding author. Our investigation identified multiple instances of internal and external duplications, overlaps, and reuse of Western Blot (WB) images. These include:

**Internal Duplications:**

Figure 1D: WB bands for PARP in HEY cells and SKOV3 cells overlap.

Figure 2B: WB bands for beta-actin in SKOV3 cells overlap with the beta-actin bands in HEY cells in Figure 5B.

Figure 3D: WB of beta-actin in SKOV3 cells was reused in Figures 6C and 6D, illustrating different treatments.

Figure 5A: WB bands for beta-catenin in SKOV3 cells overlap with HEY beta-catenin bands in Figure 5F.

Figure 5A: WB bands for Cyclin D1 in SKOV3 cells overlap with SKOV3 E-cadherin bands in Figure 6C.

Figure 5A: WB for Cyclin D1 in SKOV3 cells is the same as the HEY vimentin blot in Figure 6D.

Figure 5B: Beta-actin WB and Figure 5D beta-catenin WB in SKOV3 cells are the same.

**Reuse of Images in a 2017 article [1]:**

Figure 3D: Beta-actin image for SKOV3 cells was reused in Figure 5F [1].

Figure 5C: Beta-catenin image was found to overlap with the Caspase 1 image in Figure 4B [1].

Figure 5C: WB for GSK 3 beta was reused in Figure 5F as Caspase 1 WB [1].

Figure 6C: HEY cells' beta-actin image is overlapping with the beta-actin image in Figure 4B [1].

Supplementary Figure 2B: WB bands of beta-catenin overlap with beta-actin bands in Figure 4B [1].

**External Duplication:**

The beta-actin bands in Figure 3D overlap with WB bands in Figure 4E in an unrelated paper [2].

Given these findings, the editorial decision has been made to retract the paper. Although the authors initially sent a retraction agreement letter, they did not confirm their agreement with the retraction text.

Original article: Oncotarget. 2016; 7:28369–28383. <https://doi.org/10.18632/oncotarget.8619>**REFERENCES**

1. Yuan C, Liu C, Wang T, He Y, Zhou Z, Dun Y, Zhao H, Ren D, Wang J, Zhang C, Yuan D. Chikusetsu saponin IVa ameliorates high fat diet-induced inflammation in adipose tissue of mice through inhibition of NLRP3 inflammasome activation and NF- $\kappa$ B signaling.

Oncotarget. 2017; 8:31023–40. <https://doi.org/10.18632/oncotarget.16052>. [PubMed]. Retraction in: Oncotarget. 2025; 16:814. <https://doi.org/10.18632/oncotarget.28781>. [PubMed]

2. Gao Y, Yuan D, Gai L, Wu X, Shi Y, He Y, Liu C, Zhang C, Zhou G, Yuan C. Saponins from *Panax japonicus* ameliorate age-related renal fibrosis by inhibition of inflammation mediated by NF- $\kappa$ B and TGF- $\beta$ 1/Smad signaling and suppression of oxidative stress via activation of Nrf2-ARE signaling. J Ginseng Res. 2021; 45:408–19. <https://doi.org/10.1016/j.jgr.2020.08.005>. [PubMed]
